# Supplementary material for: Liaisons between Survivin and Plk1 during Cell Division and Cell Death
Source: PubMed Central journal article supplement — J Biol Chem. 2010 Apr 28;285(29):22592–604. doi: 10.1074/jbc.M109.065003 (PMC2903399; doi:10.1074/jbc.m109.065003), 2010-04-28
Supplement: supp_M109.065003_Supplementary_figures_Colnaghi_and_Wheatley.pdf [file supp_M109.065003_Supplementary_figures_Colnaghi_and_Wheatley.pdf]

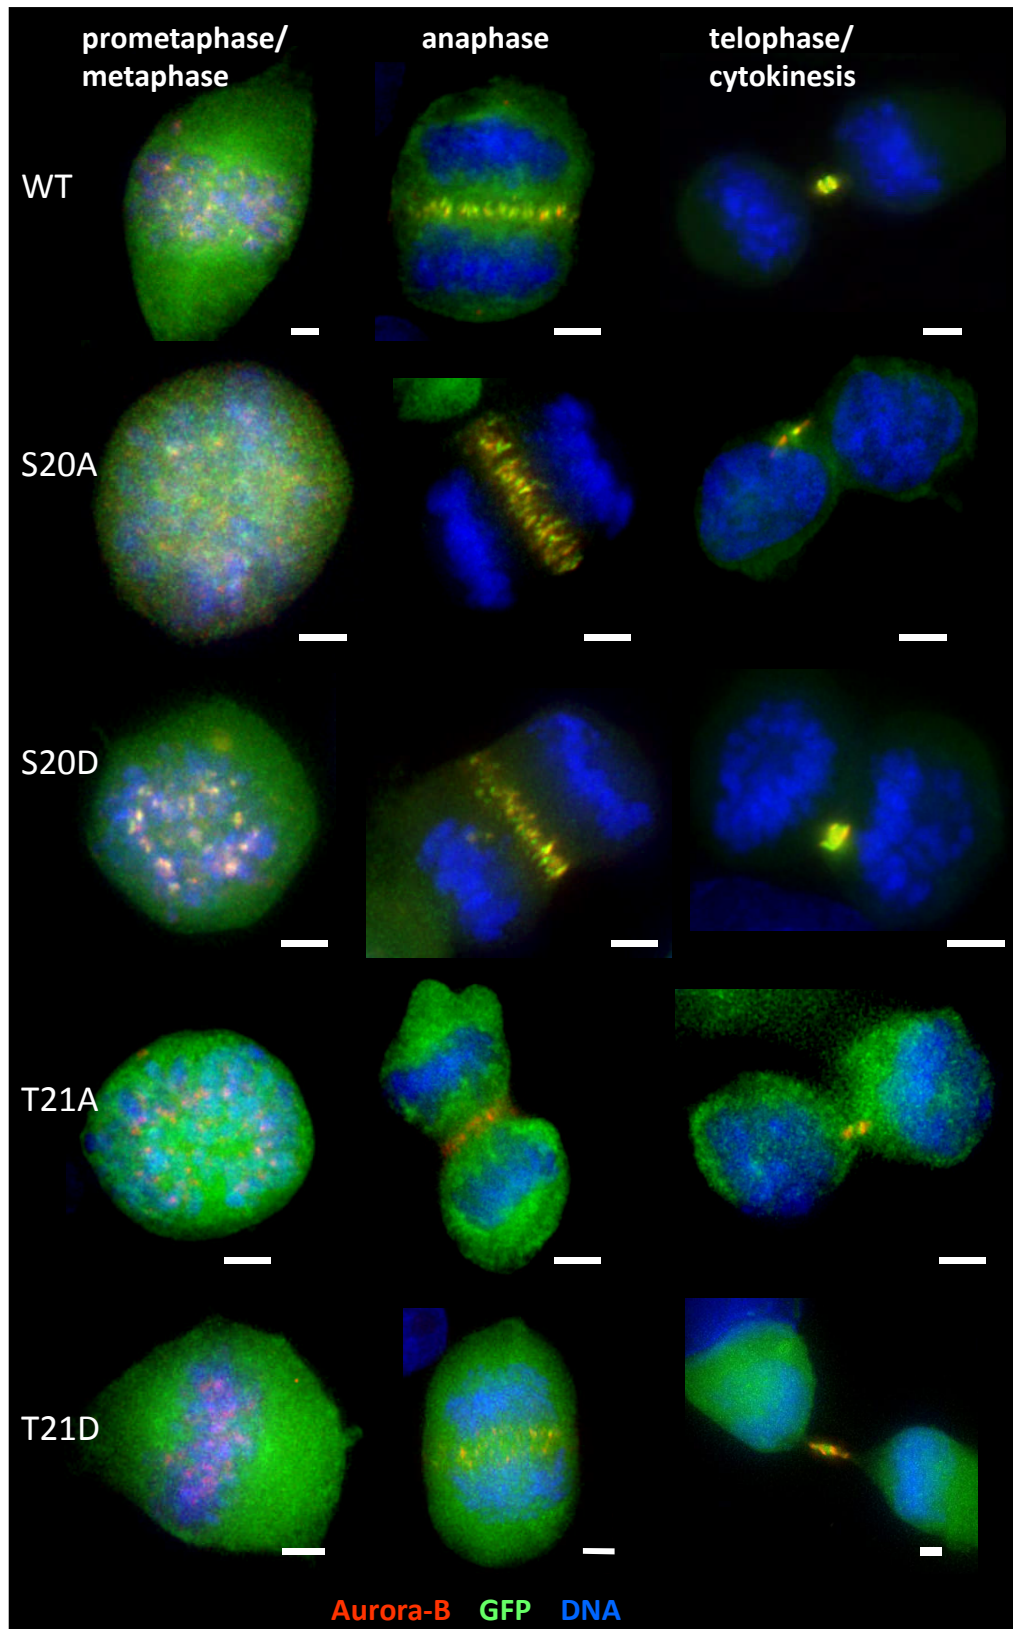

**Supplementary Figure 1:** Aurora-B localisation is unaffected by the ectopic expression of survivin-GFP mutants. The cell lines indicated were immunoprobed to reveal aurora-B localisation (red). Representative cells in prometaphase or metaphase, anaphase or telophase/cytokinesis are presented to demonstrate that aurora-B localises normally at the centromere, midzone or midbody respectively. Bars 5µm.

**Colnaghi & Wheatley.**

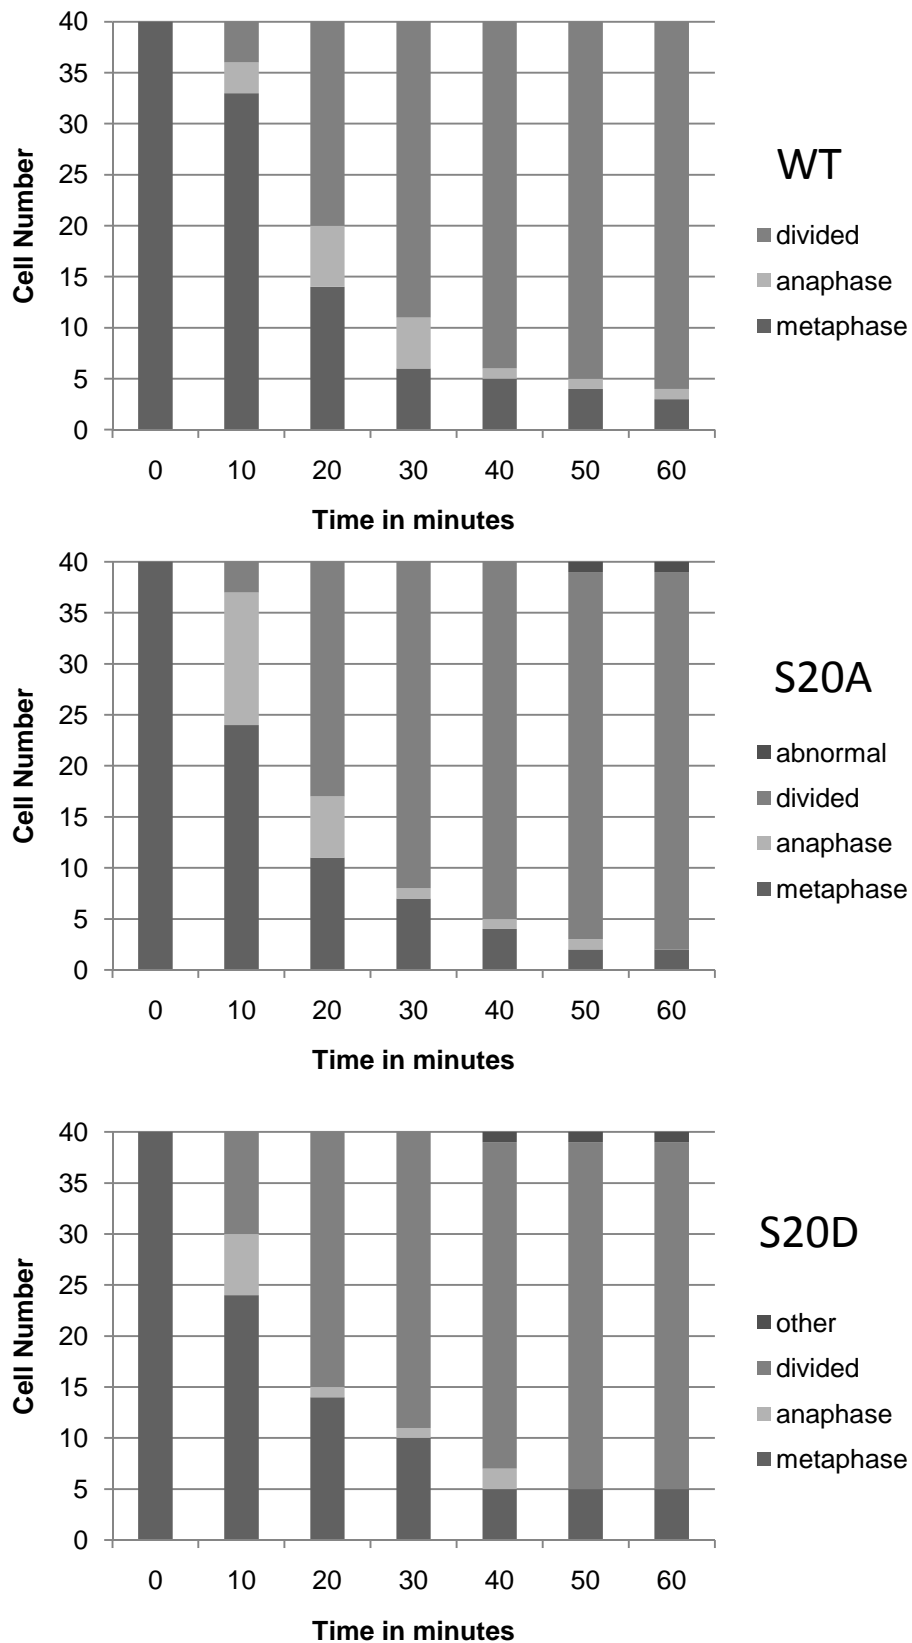

**Supplementary Figure 2:** Cells were harvested by mitotic shake-off directly onto poly-lysine coated live-cell imaging chambers and imaged at 10 minute intervals for 60 minutes, using an inverted Zeiss 510 confocal microscope and x 20 objective. The number of cells in prometaphase/metaphase (collectively labelled metaphase), anaphase or dividing/divided were tallied and compared. N=40.
